## The Interaction of Caffeine with Pentobarbital as a Nighttime Hypnotic

William H. Forrest, Jr., M.D.,\* J. Weldon Bellville, M.D.,†  
Byron W. Brown, Jr., Ph.D.‡

The interaction of caffeine with pentobarbital taken for its hypnotic effect was studied in 42 medical and surgical patients. Each patient received the following medications orally: a lactose placebo; 250 mg caffeine; 100 mg pentobarbital; and 250 mg caffeine plus 100 mg pentobarbital. Hypnotic effects were determined by patient evaluation of sleep. Caffeine had an adverse effect on sleep, whereas pentobarbital was an effective hypnotic. Together, their effects appeared additive, and the 250 mg caffeine plus 100 mg pentobarbital combination was not distinguishable from the placebo. (Key words: Caffeine; Pentobarbital; Drug interaction; Hypnotics.)

PRESENT HOSPITAL PRACTICE often permits patients to drink beverages containing caffeine in the evening and then obtain barbiturates to enable them to sleep at night. This may be an example of a problem of considerable magnitude, for 47 per cent of college student's wives surveyed by Goldstein and Kaiser<sup>1</sup> thought their coffee-drinking habits caused some degree of insomnia, while 49 per cent of hospital patients studied by Shapiro *et al.*<sup>2</sup> received at least one of four commonly used hypnotics for treatment of insomnia. Since coffee is widely drunk and barbiturates are

commonly used to treat insomnia, we decided to investigate the effects on sleep of the interaction of these two drugs when taken together in the evening. In a controlled study, utilizing a population of medical and surgical patients, we determined the effects on nighttime sleep of caffeine,§ pentobarbital,¶ and the two in combination. We have previously demonstrated the sensitivity of our method in a study of patients in a Veterans Administration Hospital.<sup>3</sup>

### Method

#### PATIENT SELECTION

All patients on the medical and surgical wards of the Palo Alto Veterans Administration Hospital who were staying in the hospital for at least a week, needed nighttime hypnotics, and were not taking interfering drugs such as tranquilizers, analgesics, or other long-acting sedatives, were considered candidates. They were informed that we were interested in studying the effects that several drugs would have on sleep and that their bedtime medications would contain caffeine, pentobarbital or a combination of the two. They were further advised that if sleep was not satisfactory after four hours, they could receive a supplemental hypnotic (100 mg secobarbital or pentobarbital). Patients who consented and signed a release form were admitted to the study. The study group consisted of 41 men and a woman. Mean age was 46.4 years, mean height 173.5 cm, and mean weight 67.4 kg.

#### MEDICATIONS

For each participant, a "round" of all four medications—250 mg caffeine, 100 mg pentobarbital, a lactose placebo, and 250 mg caf-

\* Chairman, VA Cooperative Analgesic Study; Chief, Anesthesiology Service, VAH, Palo Alto, California; Associate Professor of Anesthesia, Stanford University.

† Professor of Anesthesia, Stanford University.

‡ Professor of Community and Preventive Medicine (Biostatistics), Stanford University.

Received from the Department of Anesthesia, Stanford University School of Medicine, Stanford, California; the Veterans Administration Hospital, Palo Alto, California; and the Division of Biostatistics, Department of Community and Preventive Medicine, Stanford University, Stanford, California. Accepted for publication July 12, 1971. Supported by funds from the United States Veterans Administration; by grants from the National Academy of Sciences-National Research Council, Committee on Problems of Drug Dependence; from funds contributed by a group of interested pharmaceutical companies; and by Grants T 01 GM 862 and GM 12527 from the National Institutes of Health.

§ As the citrate.

¶ Sodium pentobarbital (Nembutal), supplied by Abbott Laboratories.

TABLE 1. Rating of Interview Questions

| Question 1<br>(How did you sleep last night?) | Question 2<br>(How many minutes passed before you fell asleep?) | Question 3<br>(How many hours did you sleep?) | Question 4<br>(How did your sleep compare with your usual night's sleep at home?) |
|-----------------------------------------------|-----------------------------------------------------------------|-----------------------------------------------|-----------------------------------------------------------------------------------|
| 5 Very good                                   | 8 0-10                                                          | 0 0-0.5                                       | 3 Better than usual night's                                                       |
| 4 Good                                        | 7 11-20                                                         | 1 0.6-1.5                                     | 2 Same as sleep at                                                                |
| 3 Fair                                        | 6 21-30                                                         | 2 1.6-2.5                                     | 1 Worse than home.                                                                |
| 2 Poor                                        | 5 31-45                                                         | 3 2.6-3.5                                     |                                                                                   |
| 1 Terrible                                    | 4 46-60                                                         | 4 3.6-4.5                                     |                                                                                   |
|                                               | 3 61-120                                                        | 5 4.6-5.5                                     |                                                                                   |
|                                               | 2 121-180                                                       | 6 5.6-6.5                                     |                                                                                   |
|                                               | 1 more than 181                                                 | 7 6.6-7.5                                     |                                                                                   |
|                                               |                                                                 | 8 7.6-8.5                                     |                                                                                   |
|                                               |                                                                 | 9 8.6 or more                                 |                                                                                   |

feine plus 100 mg pentobarbital—was prepared in identical capsules and administered randomly under double-blind conditions. Medications were taken orally at 9:30 PM, normal hospital bedtime, on consecutive nights. Patients were instructed not to drink coffee, tea or cola after 6:00 PM.

#### DATA COLLECTION

Each patient was interviewed the morning of the day following medication by a nurse-observer trained in the subjective-response interview technique. She asked the following questions: "How did you sleep last night?"; "How many minutes passed before you fell asleep?"; "How many hours did you sleep?"; "How did your sleep compare with your usual night's sleep at home?"

Answers were rated as shown in table 1.

Patients who needed a second medication because of unsatisfactory sleep were asked to consider only the first medication and the period between the first and second medications when grading their responses. Finally, the nurse recorded adverse effects that she observed and those volunteered by the patient. All observations were recorded on the patient's Sedative Data Form (fig. 1).

Data for all response variables were analyzed by computing mean responses, analyses of variance and incidence of adverse effects.

#### Results

Of the 42 patients who volunteered for the study, eight did not complete a round of medications. Of these eight, four had been placed on interfering drugs, two were discharged, one was eliminated for medical reasons, and one

asked to be dropped from the study after receiving caffeine.

Supplemental hypnotic during the night was requested 22 times by 14 patients. There were 12 requests after caffeine, six after caffeine-pentobarbital, three after placebo, and one after pentobarbital (the only patient who requested supplemental medication on all four nights). Clearly, caffeine affected sleep adversely.

#### MEAN RESPONSES

Mean responses to all questions by the 34 subjects who completed the study are shown in table 2. The responses are scaled answers to the four questions. Results were quite similar for all questions. After receiving caffeine, patients reported the poorest night's sleep, the longest time to achieve sleep, the shortest period of sleep, and poorest comparative sleep. Responses relating to the caffeine-plus-pentobarbital combination and to the placebo were similar and scored higher than responses to caffeine. Pentobarbital resulted in the highest-scoring responses to all questions, indicating the most satisfactory sleep.

#### TESTS OF SIGNIFICANCE

Analysis showed that patient variation was significant ( $P < 0.01$ ) for all response variables. Individual differences in previous caffeine use, prior barbiturate use and habitual insomnia, also disturbance from ward noise may have contributed to this finding, but significant patient variation in our population of patients in a Veterans Administration Hospital is not unusual.<sup>3</sup> The time-order effect (i.e., the day on which each medication was re-

### SEDATIVE DATA FORM

## PART ONE

[illegible]

### SEDATIVE DATA FORM

## PART TWO

1 2 3 4 5 6 7 8 9 10 11 12 13 14 15 16 17 18 19 20 21 22 23 24 25 26 27 28

29 30 31 32 33 34 35 36 37 38 39

40 41 42 43 44 45 46 47 48

49 50 51 52 53 54 55 56 57 58 59 60 61

62 63 64 65 66 67 68

69 70 71 72 73 74 75 76

77 78 79 80

81 82 83 84 85 86 87 88 89 90 91 92 93 94 95 96 97 98 99 100

101 102 103 104 105 106 107 108 109 110 111 112 113 114 115 116 117 118 119 120 121 122 123 124 125 126 127 128 129 130 131 132 133 134 135 136 137 138 139 140 141 142 143 144 145 146 147 148 149 150 151 152 153 154 155 156 157 158 159 160 161 162 163 164 165 166 167 168 169 170 171 172 173 174 175 176 177 178 179 180 181 182 183 184 185 186 187 188 189 190 191 192 193 194 195 196 197 198 199 200

201 202 203 204 205 206 207 208 209 210 211 212 213 214 215 216 217 218 219 220 221 222 223 224 225 226 227 228 229 230 231 232 233 234 235 236 237 238 239 240 241 242 243 244 245 246 247 248 249 250 251 252 253 254 255 256 257 258 259 260 261 262 263 264 265 266 267 268 269 270 271 272 273 274 275 276 277 278 279 280 281 282 283 284 285 286 287 288 289 290 291 292 293 294 295 296 297 298 299 300

301 302 303 304 305 306 307 308 309 310 311 312 313 314 315 316 317 318 319 320 321 322 323 324 325 326 327 328 329 330 331 332 333 334 335 336 337 338 339 340 341 342 343 344 345 346 347 348 349 350 351 352 353 354 355 356 357 358 359 360 361 362 363 364 365 366 367 368 369 370 371 372 373 374 375 376 377 378 379 380 381 382 383 384 385 386 387 388 389 390 391 392 393 394 395 396 397 398 399 400

401 402 403 404 405 406 407 408 409 410 411 412 413 414 415 416 417 418 419 420 421 422 423 424 425 426 427 428 429 430 431 432 433 434 435 436 437 438 439 440 441 442 443 444 445 446 447 448 449 450 451 452 453 454 455 456 457 458 459 460 461 462 463 464 465 466 467 468 469 470 471 472 473 474 475 476 477 478 479 480 481 482 483 484 485 486 487 488 489 490 491 492 493 494 495 496 497 498 499 500

501 502 503 504 505 506 507 508 509 510 511 512 513 514 515 516 517 518 519 520 521 522 523 524 525 526 527 528 529 530 531 532 533 534 535 536 537 538 539 540 541 542 543 544 545 546 547 548 549 550 551 552 553 554 555 556 557 558 559 560 561 562 563 564 565 566 567 568 569 570 571 572 573 574 575 576 577 578 579 580 581 582 583 584 585 586 587 588 589 590 591 592 593 594 595 596 597 598 599 600

601 602 603 604 605 606 607 608 609 610 611 612 613 614 615 616 617 618 619 620 621 622 623 624 625 626 627 628 629 630 631 632 633 634 635 636 637 638 639 640 641 642 643 644 645 646 647 648 649 650 651 652 653 654 655 656 657 658 659 660 661 662 663 664 665 666 667 668 669 670 671 672 673 674 675 676 677 678 679 680 681 682 683 684 685 686 687 688 689 690 691 692 693 694 695 696 697 698 699 700

701 702 703 704 705 706 707 708 709 710 711 712 713 714 715 716 717 718 719 720 721 722 723 724 725 726 727 728 729 730 731 732 733 734 735 736 737 738 739 740 741 742 743 744 745 746 747 748 749 750 751 752 753 754 755 756 757 758 759 760 761 762 763 764 765 766 767 768 769 770 771 772 773 774 775 776 777 778 779 780 781 782 783 784 785 786 787 788 789 790 791 792 793 794 795 796 797 798 799 800

801 802 803 804 805 806 807 808 809 810 811 812 813 814 815 816 817 818 819 820 821 822 823 824 825 826 827 828 829 830 831 832 833 834 835 836 837 838 839 840 841 842 843 844 845 846 847 848 849 850 851 852 853 854 855 856 857 858 859 860 861 862 863 864 865 866 867 868 869 870 871 872 873 874 875 876 877 878 879 880 881 882 883 884 885 886 887 888 889 890 891 892 893 894 895 896 897 898 899 900

901 902 903 904 905 906 907 908 909 910 911 912 913 914 915 916 917 918 919 920 921 922 923 924 925 926 927 928 929 930 931 932 933 934 935 936 937 938 939 940 941 942 943 944 945 946 947 948 949 950 951 952 953 954 955 956 957 958 959 960 961 962 963 964 965 966 967 968 969 970 971 972 973 974 975 976 977 978 979 980 981 982 983 984 985 986 987 988 989 990 991 992 993 994 995 996 997 998 999 1000

1001 1002 1003 1004 1005 1006 1007 1008 1009 1010 1011 1012 1013 1014 1015 1016 1017 1018 1019 1020 1021 1022 1023 1024 1025 1026 102

FIG. 1. Form carried by the nurse-observer to the bedside for direct recording of data. (Part two, a duplicate of part one, is sent directly to the keypunch operator without the need for data transcription.)

ceived—first, second, etc.) was significant for Question 1 only ( $P < 0.03$ ). The medication-order effect (*i.e.*, the effect of one drug on the next to be given) was significant for Question 1 ( $P < 0.01$ ), Question 3 ( $P < 0.025$ ) and

Question 4 ( $P < 0.03$ ). Treatment effect was significant for all response variables ( $P < 0.01$ ).

Treatment effect was further analyzed to determine the effects of caffeine, pentobar-

TABLE 2. Mean Responses to Four Questions, 34 Completers

| Question                                                             | Caffeine,<br>250 mg | Pentobarbital,<br>100 mg | Placebo         | Caffeine,<br>250 mg,<br>plus<br>Pentobarbital,<br>100 mg |
|----------------------------------------------------------------------|---------------------|--------------------------|-----------------|----------------------------------------------------------|
| 1) How did you sleep last night?                                     | 2.12 $\pm$ 0.26*    | 3.91 $\pm$ 0.19          | 3.32 $\pm$ 0.24 | 3.06 $\pm$ 0.29                                          |
| 2) How many minutes passed before you fell asleep?                   | 3.21 $\pm$ 0.31     | 5.91 $\pm$ 0.26          | 4.74 $\pm$ 0.28 | 4.41 $\pm$ 0.30                                          |
| 3) How many hours did you sleep?                                     | 3.06 $\pm$ 0.49     | 6.24 $\pm$ 0.27          | 5.47 $\pm$ 0.28 | 4.65 $\pm$ 0.49                                          |
| 4) How did your sleep compare with your usual night's sleep at home? | 1.32 $\pm$ 0.12     | 2.06 $\pm$ 0.15          | 1.74 $\pm$ 0.12 | 1.74 $\pm$ 0.13                                          |

\* Standard error.

bital and the combination. For all four response variables the effects of caffeine and those of pentobarbital were significant ( $P < 0.05$ ). However, the caffeine-pentobarbital interaction effect was not significant for any response variable. Therefore, on the scales used for measurement of hypnotic effects in this study, there are no data to suggest that effects of caffeine and pentobarbital when taken together in the doses studied are more than additive.

## ADVERSE EFFECTS

The incidence of adverse effects is shown in table 3. Sleepiness, hangover and grogginess were reported frequently after all medications. Nervousness was reported primarily after caffeine.

## Discussion

The clinical pharmacologic effects of caffeine and pentobarbital when used separately at bedtime have been reported many times,<sup>1, 3-10</sup> and data from this study for caffeine alone and pentobarbital alone are in accord with these reports. Caffeine ingested at bedtime caused delayed onset of sleep, shorter duration of sleep, and less satisfying sleep. Pentobarbital caused rapid onset of sleep, longer duration of sleep, and more satisfying sleep. However, our most important finding is that when these drugs are taken together at the doses studied they seem to counteract each other's effects, and the combined result is approximately the same as that of a placebo.

Caffeine can stimulate the cerebral cortex, which usually results in impaired sleep.<sup>4</sup>

TABLE 3. Incidence of Adverse Effects, 34 Completers

|                           | Caffeine,<br>250 mg | Pentobarbital,<br>100 mg | Placebo | Caffeine, 250 mg,<br>plus pentobarbital,<br>100 mg | Total Incidence |
|---------------------------|---------------------|--------------------------|---------|----------------------------------------------------|-----------------|
| Number of Administrations | 34                  | 34                       | 34      | 34                                                 | 136             |
| Adverse effects           |                     |                          |         |                                                    |                 |
| Headache                  | 1                   | 0                        | 2       | 1                                                  | 4               |
| Sleepiness                | 5                   | 5                        | 7       | 4                                                  | 21              |
| Vertigo                   | 0                   | 1                        | 1       | 1                                                  | 3               |
| Shakiness                 | 1                   | 0                        | 0       | 1                                                  | 2               |
| Grogginess                | 3                   | 5                        | 3       | 2                                                  | 13              |
| Nervousness               | 7                   | 0                        | 1       | 1                                                  | 9               |
| Blurred vision            | 3                   | 0                        | 1       | 1                                                  | 5               |
| Nausea                    | 0                   | 0                        | 1       | 0                                                  | 1               |
| Hangover                  | 1                   | 5                        | 6       | 4                                                  | 16              |
| Dry mouth                 | 0                   | 0                        | 0       | 1                                                  | 1               |

When used chronically, caffeine may also contribute indirectly to the reversal of the hypnotic effects of pentobarbital. Data recently reported by Mitoma *et al.*<sup>11</sup> suggest that caffeine induces the hepatic microsomal system, thereby increasing the drug-metabolizing activity of the liver. Since approximately 90 per cent of pentobarbital is metabolized by hepatic transformation, its fate in the body may be markedly altered in chronic drinkers of beverages containing caffeine.

Medication order, *i.e.*, the order in which the patients received medications, was significant ( $P < 0.05$ ) for Questions 1, 3 and 4. Several factors may have contributed to this finding, particularly the need for a good night's sleep following a restless night due to ingestion of caffeine. Anticipatory effects could also have played a role if patients expected a hypnotic (better night's sleep), having received caffeine (poor night's sleep) the night before.

There are important clinical implications in these data when one considers the possible high incidence of coffee usage concomitant with the administration of nighttime hypnotics. Many patients receive some form of hypnotic during their hospital stay, and a large proportion of these probably drink coffee at mealtime or later in the evening. Minimum standards of clinical practice would require that we be aware of prior ingestion of beverages containing caffeine and increase the dosage of barbiturate accordingly. Since use of any drug is not without hazard, particularly with increasing doses, it might be better medical practice to restrict use of caffeinated beverages before bedtime, or allow coffee substitutes only. Similarly, the intake of caffeine should be controlled when preoperative sedation is given.

There is an important methodological implication in the results of this study. Our method, used to quantify positive effects on sleep of hypnotic drugs, also appears to be sensitive for drugs which have negative effects on sleep. This statement is supported by the

fact that the effect of caffeine (interference with sleep) was significant. However, to establish the method as sensitive for evaluating caffeine and other drugs which have negative effects on sleep, it would be necessary to design a study that would show a significant dose response, as well as a significant difference from the effect of a placebo.

This study was done within the framework of the Veterans Administration Cooperative Analgesic Study, in which the principal investigators are: Drs. E. C. Beer, B. J. Ciliberti, R. Defalque, W. H. Forrest, Jr., J. Katz, D. L. Mahler, P. F. Shroff and G. Teutsch. G. Feise and J. Hayden collected the data.

## References

1. Goldstein A, Kaiser S: Psychotropic effects of caffeine in man. III. A questionnaire survey of coffee drinking and its effects in a group of housewives. *Clin Pharmacol Ther* 10:477-488, 1969
2. Shapiro S, Slone D, Lewis G: Clinical effects of hypnotics. II. An epidemiologic study. *JAMA* 209:2016-2020, 1969
3. Forrest WH Jr, Bellville JW, Brown BW Jr: Methodologic considerations of the evaluation of hypnotics in man—A biologic assay of pentobarbital and secobarbital. *J Clin Pharmacol* 11:357-366, 1971
4. Goodman TS, Gilman A: *The Pharmacological Basis of Therapeutics*. Third edition. New York, Macmillan, 1965
5. Colton T, Gosselin RE, Smith RP: The tolerance of coffee drinkers to caffeine. *Clin Pharmacol Ther* 9:31-39, 1968
6. Goldstein A: Wakefulness caused by caffeine. *Arch Exp Path Pharmacol* 248:269-278, 1964
7. Goldstein A, Warren R, Kaiser S: Psychotropic effects of caffeine in man. I. Individual differences in sensitivity to caffeine-induced wakefulness. *J Pharmacol Exp Ther* 149:156-159, 1965
8. Lasagna L: A comparison of hypnotic agents. *J Pharmacol Exp Ther* 3:9-20, 1954
9. Lasagna L: A study of hypnotic drugs in patients with chronic diseases. *J Chronic Dis* 3:122, 1956
10. Lasagna L, Imboden J: An evaluation of hypnotic drugs in psychiatric patients. *Bull Johns Hopkins Hosp* 99:91-100, 1956
11. Mitoma C, Sorich TJ, Neubauer SE: The effect of caffeine on drug metabolism. *Life Science* 7:145-151, 1968
